# Supplementary material for: Educating Patients by Providing Timely Information Using Smartphone and Tablet Apps: Systematic Review
Source: PubMed Central journal article supplement (PMC7186866; doi:10.2196/17342), 2020-04-13
Supplement: jmir_v22i4e17342_app1.pdf [file jmir_v22i4e17342_app1.pdf]

## **Educating patients by providing timely information using smartphone and tablet apps. A systematic review.**

### **MEDLINE search strategy:**

("Precision Medicine"[Mesh] OR "Patient Education as Topic"[Mesh])

OR adherence with instructions[tiab]  
OR contextual information[tiab]  
OR contextual learning[tiab]  
OR individual care[tiab]  
OR individual coaching[tiab]  
OR individual education[tiab]  
OR individual information[tiab]  
OR individual instructions[tiab]  
OR individual learning[tiab]  
OR individual teaching[tiab]  
OR individualised care[tiab]  
OR individualised education[tiab]  
OR individualised information[tiab]  
OR individualised teaching[tiab]  
OR individualized care[tiab]  
OR individualized coaching[tiab]  
OR individualized education[tiab]  
OR individualized information[tiab]  
OR individualized instructions[tiab]  
OR individualized learning[tiab]  
OR individualized teaching[tiab]  
OR medication adherence[tiab]  
OR medication compliance[tiab]  
OR patient centred care[tiab]  
OR patient centred education[tiab]  
OR patient centred information[tiab]  
OR patient centred learning[tiab]  
OR patient centred teaching[tiab]  
OR patient education[tiab]  
OR patient information[tiab]  
OR patient knowledge[tiab]  
OR patient learning[tiab]  
OR patient teaching[tiab]  
OR perioperative care[tiab]  
OR personal care[tiab]  
OR personal coaching[tiab]  
OR personal education[tiab]  
OR personal information[tiab]  
OR personal instruction[tiab]  
OR personal notification[tiab]  
OR personalised care[tiab]

OR personalised information[tiab]  
OR personalized care[tiab]  
OR personalized coaching[tiab]  
OR personalized education[tiab]  
OR personalized information[tiab]  
OR personalized instruction[tiab]  
OR personalized learning[tiab]  
OR postoperative care[tiab]  
OR preoperative care[tiab]  
OR tailored advice[tiab]  
OR tailored care[tiab]  
OR tailored content[tiab]  
OR tailored education[tiab]  
OR tailored information[tiab]  
OR tailored message[tiab]  
OR tailored to the context[tiab]  
OR tailored to the patient[tiab]  
OR timely education[tiab]  
OR timely information[tiab]  
OR therapy compliance[tiab]  
OR treatment compliance[tiab]  
OR treatment adherence[tiab]  
OR treatment preparation[Tiab]

)

AND

(

("Computers, Handheld"[Mesh] OR "Smartphone"[Mesh])  
OR App[Tiab] OR Apps[Tiab]  
OR cell phone[Tiab]  
OR cell phones[Tiab]  
OR ehealth[Tiab]  
OR e-health[Tiab]  
OR e-healthcare[Tiab]  
OR electronic reminder application\*[tiab]  
OR Handheld Computer[tiab]  
OR Handheld Computers[tiab]  
OR mhealth[Tiab]  
OR m-health[Tiab]  
OR Mobile Application[Tiab]  
OR Mobile Applications[Tiab]  
OR Mobile App[Tiab]  
OR Mobile Apps[Tiab]  
OR mobile health[Tiab]  
OR mobile phone[Tiab]  
OR mobile phones[Tiab]

OR Mobile-health[tiab]  
OR Mobile-healthcare[tiab]  
OR Palm Pilot[tiab]  
OR Palm Pilots[tiab]  
OR Palmtop Computer[tiab]  
OR Palm-Top Computer[tiab]  
OR Palmtop Computers[tiab]  
OR Palm-Top Computers[tiab]  
OR PDA Computer[tiab]  
OR PDA Computers[tiab]  
OR Personal Digital Assistant[tiab]  
OR Pocket PC[tiab]  
OR Pocket PCs[tiab]  
OR Smartphone[Tiab]  
OR Smartphones[Tiab]  
OR Tablet[Tiab]  
OR Tablets[Tiab]  
OR Push-notification[Tiab]  
OR Push notification[Tiab]  
OR Telemedicine[tiab]  
OR Tele-medicine[tiab]

)

AND

(

"2014/01/01"[Date - Publication] : "2019/12/31"[Date - Publication]

)
