# Supplementary material for: Educating Patients by Providing Timely Information Using Smartphone and Tablet Apps: Systematic Review
Source: PubMed Central journal article supplement (PMC7186866; doi:10.2196/17342), 2020-04-13
Supplement: jmir_v22i4e17342_app2.pdf [file jmir_v22i4e17342_app2.pdf]

## Educating patients by providing timely information using smartphone and tablet apps. A systematic review.

### Overview of outcomes per study and instruments to assess them

| Study             | Year | Population (n)                   | Outcomes and instruments                                                                                                                                                                                                                                                                                                                                                                                         |
|-------------------|------|----------------------------------|------------------------------------------------------------------------------------------------------------------------------------------------------------------------------------------------------------------------------------------------------------------------------------------------------------------------------------------------------------------------------------------------------------------|
| Wang              | 2019 | Colonoscopy (392)                | Quality of preparation: Boston Bowel Preparation Score (P) (CR)<br>Adenoma detection: EHR (CR)<br>Satisfaction: Self-developed questionnaire (PR)                                                                                                                                                                                                                                                                |
| Timmers           | 2019 | Knee replacement (212)           | Pain: Pain at rest / during activity / at night NRS 0-10 (P) (PR)<br>QoL: EuroQol EQ-5D-3L (PR)<br>Physical functioning: Knee injury and Osteoarthritis Outcome Score Short Form (KOOS PS) (PR)<br>Satisfaction: Self-developed questionnaire (PR)<br>Health care consumption: Self-developed questionnaire (PR)                                                                                                 |
| Mata              | 2019 | Colorectal surgery (97)          | Adherence: Assessment of Early Recovery Protocol (P) (PR)<br>Length of stay: EHR (CR)<br>Complications: EHR (CR)<br>Satisfaction: 4 items from the Consumer Assessment of Healthcare Providers and Systems Surgical Care Survey (S-CAHPS) (PR)                                                                                                                                                                   |
| Li                | 2019 | Pediatric day-care surgery (127) | Quality of recovery: Health Index (Physiological function, ability to perform daily activities, injury response) (P) (PR)<br>Satisfaction: Self-developed questionnaire (PR)<br>Time consumption during follow-up: EHR (CR)                                                                                                                                                                                      |
| Jeon              | 2019 | Colonoscopy (281)                | Quality of preparation: Ottawa Bowel Preparation Scale (P) (CR)<br>Adenoma Detection Rate: EHR (CR)                                                                                                                                                                                                                                                                                                              |
| Van der Meij      | 2018 | Abdominal surgery (344)          | First return to normal activity: Dutch–Flemish Patient-Reported Outcomes Measurement Information System (PROMIS) Physical Function (PROMIS-PF) (P) (PR)<br>Return to work / physical activities: International Physical Activity Questionnaire (IPAQ) (PR)<br>QoL: EuroQol EQ-5D-3L (PR)<br>Pain: Pain intensity VAS 0-100 (PR)<br>Satisfaction: Self-developed questionnaire (PR)<br>Healthcare costs: EHR (CR) |
| Timmers           | 2018 | Knee replacement (213)           | Knowledge: Self-developed questionnaire (P) (PR)<br>Mobile device proficiency: Mobile Device Proficiency Questionnaire 16 (PR)<br>Treatment chosen: Self-developed questionnaire (PR)<br>Satisfaction: Self-developed questionnaire (PR)                                                                                                                                                                         |
| Najafi Ghezjeljeh | 2018 | Hypertension (100)               | Hypertension self-management: Hypertension Self-Management Behavior Questionnaire (HSMBQ) (P) (PR)                                                                                                                                                                                                                                                                                                               |
| Hardt             | 2018 | Knee replacement (60)            | Range of motion: EHR (P) (CR)<br>Pain: Pain at rest / during activity NRS 0-10 (PR)<br>Physical functioning: Knee injury and Osteoarthritis Outcome Score (KOOS) (PR)<br>Knee Society Score (KSS) (PR)<br>Clinical outcomes: EHR (CR)                                                                                                                                                                            |
| Alanzi            | 2018 | Diabetes Mellitus (92)           | Knowledge: Diabetic Knowledge Test (DKT-24) (P) (PR)<br>Self-efficacy: Diabetes Mellitus Self-Efficacy Scale (PR)                                                                                                                                                                                                                                                                                                |
| Widmer            | 2017 | Cardiac rehabilitation (80)      | In-person hospital visits: EHR (P) (CR)<br>Clinical parameters: EHR (CR)<br>QoL: Dartmouth QOL (PR)                                                                                                                                                                                                                                                                                                              |

|                 |      |                                   |                                                                                                                                                                                                                                                                                                                                                                                                                                            |
|-----------------|------|-----------------------------------|--------------------------------------------------------------------------------------------------------------------------------------------------------------------------------------------------------------------------------------------------------------------------------------------------------------------------------------------------------------------------------------------------------------------------------------------|
| Asklund         | 2017 | Stress urinary incontinence (123) | Symptom severity: International Consultation on Incontinence Modular Questionnaire Urinary Incontinence Short Form [ICIQ-UI SF] (P) (PR)<br>QoL: ICIQ Lower Urinary Tract Symptoms Quality of Life [ICIQ-LUTSqol] (PR)                                                                                                                                                                                                                     |
| Sharara         | 2017 | Colonoscopy (160)                 | Quality of preparation: Aronchick Scale (P), Ottawa Bowel Preparation Scale, Chicago Bowel Preparation Scale (CR)<br>Adherence to prescribed diet: Self-developed questionnaire (PR)<br>Satisfaction: Self-developed questionnaire (PR)                                                                                                                                                                                                    |
| Perry           | 2017 | Asthma (34)                       | Asthma control: Asthma Control Test (ACT) (P) (PR)<br>Expiratory volume: EHR (CR)                                                                                                                                                                                                                                                                                                                                                          |
| Lee             | 2017 | Breast cancer (120)               | Mammogram receipt: Self-developed questionnaire (P) (PR)<br>Knowledge: Breast Cancer Knowledge Test (PR)<br>Satisfaction: Self-developed questionnaire (PR)                                                                                                                                                                                                                                                                                |
| Lakshminarayana | 2017 | Parkinson's disease (158)         | Medication adherence: Morisky Medication Adherence Scale (MMAS-8) (P) (PR)<br>QoL: Parkinson's Disease Questionnaire (PDQ-39) (PR)<br>Quality of consultation: Patient-Centered Questionnaire (PCQ-PD) (PR)<br>Anxiety and depression: Hospital Anxiety and Depression Scale (HADS) (PR)<br>Beliefs about medication: Beliefs about Medication Questionnaire (PR)<br>Non-Motor symptom questionnaire: Non-Motor Symptom Questionnaire (PR) |
| Guo             | 2017 | Atrial fibrillation (209)         | Knowledge: Knowledge: Self-developed questionnaire (P) (PR)<br>QoL: EuroQol EQ-5D-5L (PR)<br>Adherence: Pharmacy Quality Adherence Measures (PR)<br>Satisfaction: Self-developed questionnaire (PR)                                                                                                                                                                                                                                        |
| Van Reijnen     | 2017 | Ankle trauma (220)                | Incidence of ankle sprains: Self-developed questionnaire (P) (PR)<br>Residual pain and ankle disability: Functional Disability Ankle Index (FADI) (PR)                                                                                                                                                                                                                                                                                     |
| Kang            | 2016 | Colonoscopy (650)                 | Bowel preparation: Ottawa Score (P) (CR)<br>Compliance with instructions: EHR (CR)<br>Cecal intubation rate: EHR (CR)<br>Adenoma Detection Rate: EHR (CR)                                                                                                                                                                                                                                                                                  |
| Johnston        | 2016 | Myocardial infarction (174)       | Medication adherence: Medication Adherence Rating Scale (MARS-5) (P) (PR)<br>Clinical outcomes: EHR (CR)<br>QoL: EuroQol EQ-5D-3L (PR)<br>Satisfaction: System Usability Score (PR)                                                                                                                                                                                                                                                        |
| Lorenzo-Zuniga  | 2015 | Colonoscopy (260)                 | Bowel preparation: Harefield Cleansing Scale (HCS) (P) (CR)<br>Satisfaction: Self-developed questionnaire (PR)                                                                                                                                                                                                                                                                                                                             |

(P): Primary outcome

QoL: Quality of Life

EHR: from the Electronic Health Record (or hospital information system)

PR: Patient Reported

CR: Clinician Reported
